# Supplementary material
Source: PubMed Central journal article supplement (PMC2975718)
Supplement: supp_M009563_jlr.M009563-1.pdf [file supp_M009563_jlr.M009563-1.pdf]

**Supplemental table 1** QTLs for liver weight in (A/J × SM.A-*T2dm2sa*)F2 mice after 11 weeks feeding of a high-fat diet.

| Phenotype                   | Nearest Marker | Position (Mb) | LOD <sup>a</sup> | QTL            | % <sup>b</sup> | Phenotype based on genotype <sup>c</sup> |                   |                         |
|-----------------------------|----------------|---------------|------------------|----------------|----------------|------------------------------------------|-------------------|-------------------------|
|                             |                |               |                  |                |                | SM/SM                                    | SM/A              | A/A                     |
| <b>Liver</b><br>(g/100g bw) | D11Mit242      | 63.2          | <b>8.7**</b>     | <i>Livq3sa</i> | 15             | <b>4.63 ± 0.71 (69)</b>                  | 4.24 ± 0.59 (129) | 3.92 ± 0.53 (57)        |
|                             | D13Mit53       | 113.1         | 2.1              |                | 4              | 4.24 ± 0.71 (57)                         | 4.18 ± 0.62 (128) | <b>4.48 ± 0.66 (70)</b> |
|                             | D15Mit52       | 22.4          | <b>6.3**</b>     | <i>Livq4sa</i> | 6              | 4.09 ± 0.56 (72)                         | 4.17 ± 0.61 (112) | <b>4.62 ± 0.71 (71)</b> |
|                             | D17Mit68       | 47.7          | 3.5              |                | 6              | 4.01 ± 0.61 (68)                         | 4.40 ± 0.69 (120) | <b>4.31 ± 0.60 (67)</b> |

\*\* Highly significant level; the other LOD scores without asterisks denote suggestive level linkage.

<sup>a</sup> The maximum LOD scores, exceeding suggestive threshold level. Suggestive, significant, or highly significant thresholds derived from free model permutation for each trait were as follows: for liver weight (2.1, 3.6, 5.1).

<sup>b</sup> Percentage of phenotypic variance explained by the QTL.

<sup>c</sup> Phenotype based on genotype at the nearest marker. Data are expressed means ± SD for genotypes. The number of mice of each genotype is indicated in parentheses. The higher mean of SM/SM or A/A were written by bold-faced letter.
